# Supplementary material
Source: MDPI journal article supplement (https://www.mdpi.com/1999-4907/15/3/404)
Supplement: s1 [file s1]

## Supplementary Material

**Figure S1.** Wood densities comparison.

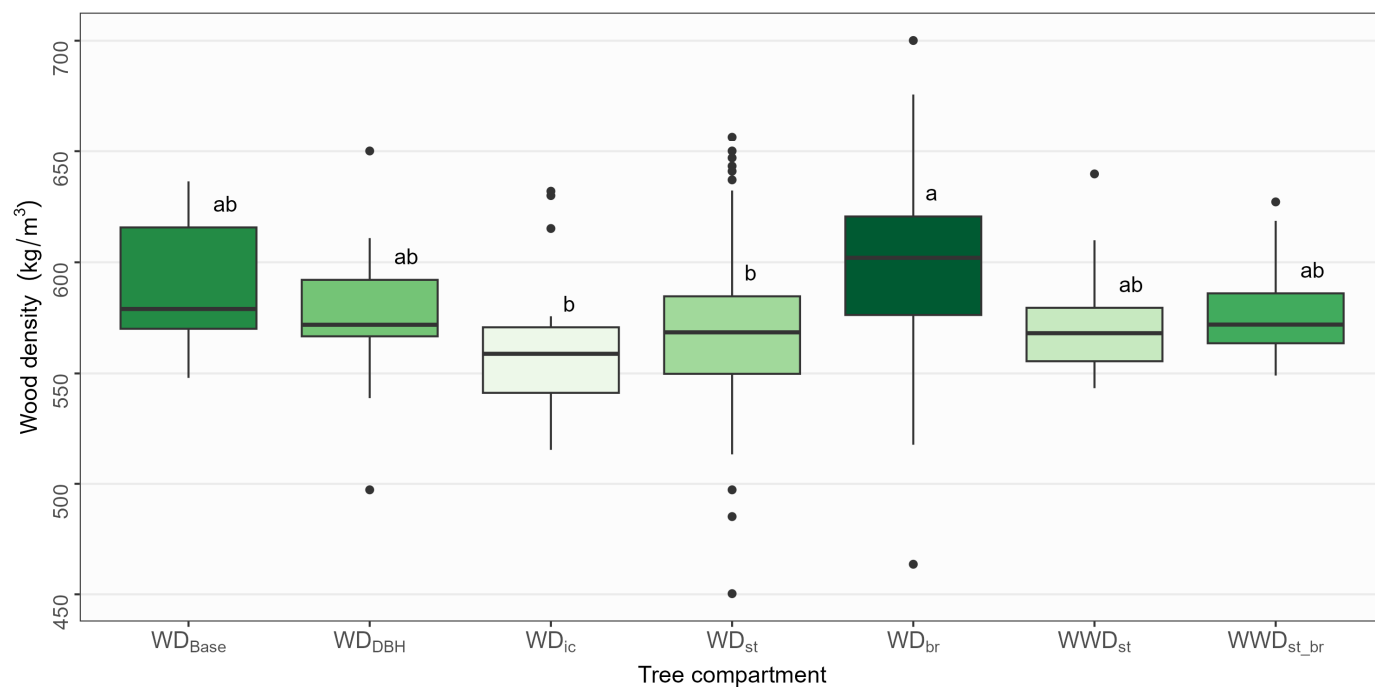

Where, WDBase = density at the base of the tree; WDBH = density at the level of 1.3 m; WDic = increment core density; WDst = stem density without weighting; WDbr = branches density; WWDst = stem weighted wood density; WWDst\_br = density-weighted by stem and branch volume. Different letters represent significant differences at  $p < 0.05$  probability level (Tukey's test).

**Figure S2.** QQ-plot of above ground biomass (i.e.,  $AGB_{total}$ ) estimation using allometric equation from model 1 (A) and from model 2 (B). The structure: for model 1 -  $AGB_{total} = a \cdot DBH^b$  and for model 2 -  $AGB_{total} = a \cdot DBH^b \cdot H^c$ , where  $a$ ,  $b$  and  $c$  are model parameters described in Table 3. DBH and H are diameter at breast height respectively tree height used as independent variables.

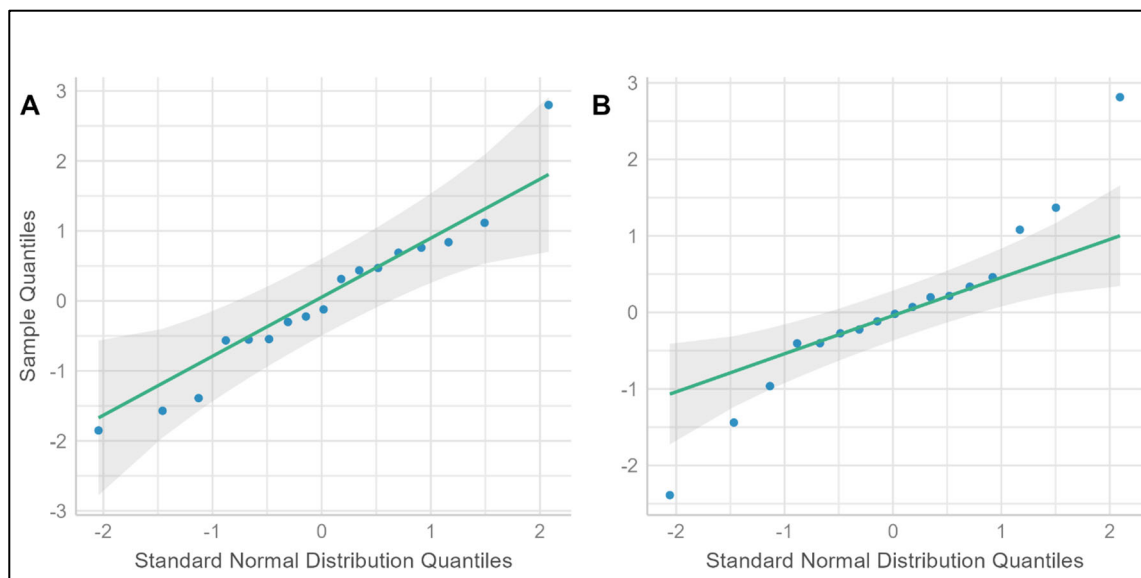

95% CI (confidence interval) is provided in light gray.

**Table S1.** Sampled trees general characteristics and above ground biomass estimation in each compartment.

| Tree ID | DBH (cm) | H (m) | L <sub>crown</sub> (m) | Stump (kg)* | Stem (kg) | Branch (kg) | Leaf (kg)** | AGB (kg) |
|---------|----------|-------|------------------------|-------------|-----------|-------------|-------------|----------|
| 1       | 16.8     | 15.8  | 10.6                   | 4.0         | 94.7      | 29.0        | -           | 127.7    |
| 2       | 18.8     | 13.3  | 9.9                    | 3.3         | 89.8      | 36.8        | -           | 129.9    |
| 3       | 19.1     | 16.5  | 9.6                    | 3.2         | 137.2     | 84.3        | 7.78        | 232.5    |
| 4       | 20.1     | 15.6  | 8.1                    | 2.8         | 125.9     | 53.1        | -           | 181.8    |
| 5       | 22.3     | 15.1  | 1.6                    | 9.8         | 141.7     | 80.5        | -           | 232.0    |
| 6       | 30.1     | 21.7  | 11.5                   | 7.5         | 368.6     | 42.7        | 6.28        | 425.2    |
| 7       | 30.9     | 20.8  | 12.1                   | 7.1         | 491.0     | 161.9       | -           | 660.0    |
| 8       | 31.0     | 27.4  | 18.7                   | 6.4         | 559.1     | 103.7       | 5.52        | 674.7    |
| 9       | 31.7     | 22.0  | 17.6                   | 33.8        | 425.1     | 148.7       | -           | 607.5    |
| 10      | 33.5     | 22.7  | 12.0                   | 8.9         | 454.1     | 130.8       | -           | 593.7    |
| 11      | 35.3     | 20.6  | 12.1                   | 26.1        | 496.3     | 299.4       | -           | 821.8    |
| 12      | 35.8     | 26.7  | 18.6                   | 11.2        | 670.7     | 263.0       | 15.12       | 960.0    |
| 13      | 36.0     | 23.4  | 16.6                   | 8.0         | 603.3     | 185.3       | 13.86       | 810.5    |
| 14      | 42.0     | 33.1  | 9.9                    | 16.8        | 1409.8    | 114.6       | 3.92        | 1545.0   |
| 15      | 45.5     | 30.2  | 16.6                   | 14.4        | 1388.5    | 325.0       | 10.53       | 1738.4   |
| 16      | 49.2     | 33.5  | 24.4                   | 18.5        | 1611.3    | 438.1       | 18.36       | 2085.9   |
| 17      | 56.5     | 31.7  | 25.2                   | 24.0        | 1970.7    | 630.3       | 34.44       | 2659.5   |

The mass of tree components is represented in the dry state. \*) The dry mass of the stump was estimated based on the density of the sample at the base and with the determined volume. AGB represents the above tree biomass. \*\*). Values for leaf biomass were not recorded for all trees as they were measured during the dormancy period. DBH is the diameter at breast height in *cm*. H is the total tree height in *m*. L<sub>crown</sub> is the length of tree crown in *m*.
